# Supplementary material for: Does Thoracic Duct Ligation at the Time of Esophagectomy Impact Long-Term Survival? An Individual Patient Data Meta-Analysis
Source: MDPI journal article supplement (doi:10.3390/jcm13102849), 2024-05-12
Supplement: s1 [file s1]

| Author, year      | Definition of Chylothorax                                                                                                                                                                                                                                                                    |
|-------------------|----------------------------------------------------------------------------------------------------------------------------------------------------------------------------------------------------------------------------------------------------------------------------------------------|
| Hou et al., 2014  | Postoperative chylothorax refers to the postoperative chylothorax that underwent surgical intervention                                                                                                                                                                                       |
| Bao et al., 2019  | Diagnosis was made by biochemical analysis of fluid. Laboratory analysis revealed high triglyceride levels in the fluid (> 1.24 mmol/L).                                                                                                                                                     |
| Fei et al., 2020  | Postoperative chylothorax was defined as triglyceride levels>110 mL/day or by the presence of chylomicrons found in pleural fluid.                                                                                                                                                           |
| Chen et al, 2020  | Then the Lipoprotein staining for chylomicrons would be considered to confirm the diagnosis. Otherwise, the chest fluid biochemical analysis with triglyceride levels greater than 1.24mmol/L (110mg/dL) or cholesterol less than 5.18mmol/L (200mg/dL) were also identified as chylothorax. |
| Yang et al., 2022 | nr                                                                                                                                                                                                                                                                                           |

**Supplementary Table 3.** Definition of postoperative chylothorax according to the included studies.
