# Supplementary material for: Does Thoracic Duct Ligation at the Time of Esophagectomy Impact Long-Term Survival? An Individual Patient Data Meta-Analysis
Source: MDPI journal article supplement (doi:10.3390/jcm13102849), 2024-05-12
Supplement: s1 [file s1]

| <b>Author, year,<br/>contry</b> | <b>Tecnhique for TDL</b>                       |
|---------------------------------|------------------------------------------------|
| Hou et al., 2014                | Mass ligation                                  |
| Bao et al., 2020                | Mass ligation<br>(5cm above the diaphragm)     |
| Fei et al., 2020                | Mass ligation<br>(2cm above the diaphragm)     |
| Chen et al., 2020               | Mass ligation<br>(8th – 9th thoracic vertebra) |
| Yang et al., 2022               | Mass ligation<br>(2cm above the diaphragm)     |

**Supplementary Table 2.** Different techniques for TDL according to the included studies.
