# Supplementary material for: Does Thoracic Duct Ligation at the Time of Esophagectomy Impact Long-Term Survival? An Individual Patient Data Meta-Analysis
Source: MDPI journal article supplement (doi:10.3390/jcm13102849), 2024-05-12
Supplement: s1 [file s1]

| <b>Study</b>      | <b>Confounding Bias</b> | <b>Selection Bias</b> | <b>Classification Bias</b> | <b>Intervention Bias</b> | <b>Missing Data Bias</b> | <b>Measurement Bias</b> | <b>Reporting Bias</b> | <b>Bias</b> |
|-------------------|-------------------------|-----------------------|----------------------------|--------------------------|--------------------------|-------------------------|-----------------------|-------------|
| Hou et al., 2014  | Serious                 | Moderate              | Low                        | Low                      | Low                      | Moderate                | Moderate              | Moderate    |
| Bao et al., 2020  | Moderate                | Low                   | Low                        | Low                      | Low                      | Moderate                | Moderate              | Moderate    |
| Fei et al., 2020  | Moderate                | Low                   | Moderate                   | Low                      | Moderate                 | Moderate                | Moderate              | Moderate    |
| Chen et al., 2020 | Moderate                | Low                   | Moderate                   | Low                      | Low                      | Low                     | Moderate              | Moderate    |
| Yang et al., 2022 | Moderate                | Serious               | Moderate                   | Moderate                 | Moderate                 | Moderate                | Moderate              | Serious     |

**Supplementary Table 1.** Quality assessment of the included studies (ROBINS-I tool). Each domain is evaluated with one of the following: Low, Moderate, Serious, and Critical. The categories of judgement for each study are low, moderate, serious, and critical risk of bias.
