# Supplementary material for: Does Thoracic Duct Ligation at the Time of Esophagectomy Impact Long-Term Survival? An Individual Patient Data Meta-Analysis
Source: MDPI journal article supplement (doi:10.3390/jcm13102849), 2024-05-12
Supplement: s1 [file s1]

5-year Overall Survival

| Certainty assessment |                        |              |               |              |             |                      | № of patients  |              | Effect            |                                           | Certainty        | Importance |
|----------------------|------------------------|--------------|---------------|--------------|-------------|----------------------|----------------|--------------|-------------------|-------------------------------------------|------------------|------------|
| № of studies         | Study design           | Risk of bias | Inconsistency | Indirectness | Imprecision | Other considerations | [intervention] | [comparison] | Relative (95% CI) | Absolute (95% CI)                         |                  |            |
| 5                    | non-randomised studies | not serious  | not serious   | serious      | serious     | strong association   |                |              | -                 | SMD 3.5 SD lower (6.1 lower to 0.8 lower) | ⊕⊕⊕○<br>Moderate | IMPORTANT  |

CI: confidence interval; SMD: standardised mean difference

Postoperative chylothorax

| Certainty assessment |                        |              |               |              |             |                                                                         | № of patients  |                | Effect                 |                                             | Certainty    | Importance |
|----------------------|------------------------|--------------|---------------|--------------|-------------|-------------------------------------------------------------------------|----------------|----------------|------------------------|---------------------------------------------|--------------|------------|
| № of studies         | Study design           | Risk of bias | Inconsistency | Indirectness | Imprecision | Other considerations                                                    | [intervention] | [comparison]   | Relative (95% CI)      | Absolute (95% CI)                           |              |            |
| 5                    | non-randomised studies | not serious  | not serious   | not serious  | not serious | all plausible residual confounding would reduce the demonstrated effect | 22/1814 (1.2%) | 23/1538 (1.5%) | RR 0.66 (0.28 to 1.56) | 5 fewer per 1,000 (from 11 fewer to 8 more) | ⊕⊕⊕⊕<br>High | IMPORTANT  |

CI: confidence interval; RR: risk ratio

Supplementary Table 4. The certainty of evidence assessed with the GRADE methodology.
