# Supplementary material for: Does Thoracic Duct Ligation at the Time of Esophagectomy Impact Long-Term Survival? An Individual Patient Data Meta-Analysis
Source: J Clin Med. 2024 May 12;13(10):2849. doi: 10.3390/jcm13102849 (PMC11122204; doi:10.3390/jcm13102849)
Supplement: Supplementary file 1 [file jcm-13-02849-s001.zip]

Archive with 4 entries (4 files):
- Suppl Table 1 ROBBINS-I.pdf
- Suppl Table 2.pdf
- Suppl Table 3.pdf
- Suppl Table 4.pdf
